# Supplementary material for: Synthesis of Bi4O5Br2from reorganization of BiOBr and its excellent visible light photocatalytic activity
Source: Royal Society of Chemistry journal article supplement (doi:10.1039/c6dt00997b), 2016-01-01
Supplement: c6dt00997b1.pdf [file c6dt00997b1.pdf]

## Supporting Information

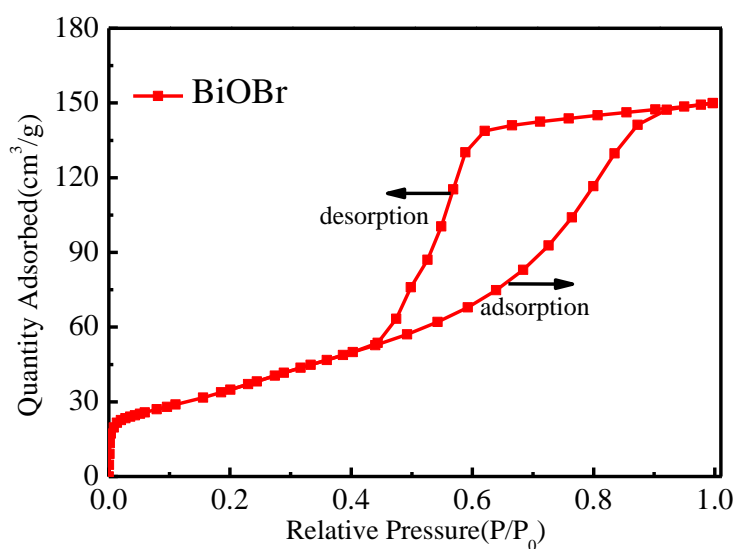

Fig. S1 Nitrogen absorption-desorption isotherms of BiOBr.

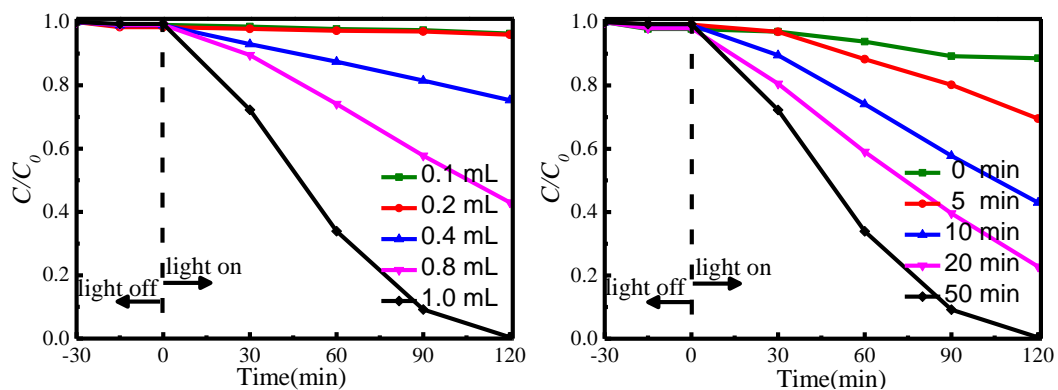

Fig. S2 Photocatalytic activities of as-prepared samples with different reaction conditions: (a) different ammonia addition, and (b) different steeping time.

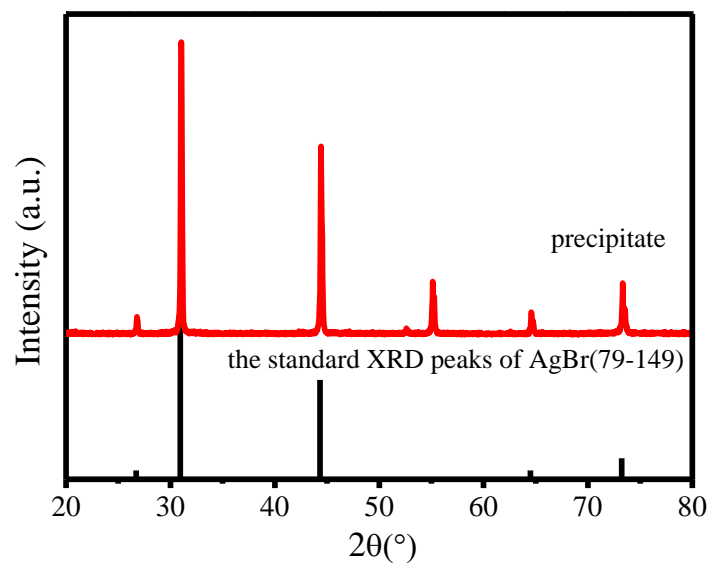

Fig. S3 XRD of samples which produced when  $\text{AgNO}_3$  was added into the supernatant of water-steeping process
